# Supplementary material for: Follicular Fluid Proteomic Analysis of Women Undergoing Assisted Reproduction Suggests Apolipoprotein A1 to Be a Potential Fertility Marker
Source: Preprints.org preprint supplement (doi:10.20944/preprints202312.0353.v1), 2023-12-06
Supplement: Supplementary file 1 [file supplementary]

Supplementary Table S1. Abbreviations of the follicular fluid proteins in the PPI analyses.

| **Abbreviation** | **Name of the protein** |
| --- | --- |
| A1BG | Alpha-1B-glycoprotein |
| A2M | Alpha-2-macroglobulin |
| AFM | Afamin |
| AGT | Angiotensin |
| AHSG | Alpha-2-HS-glycoprotein chain A |
| ALB | Serum albumin |
| AMBP | Inter-alpha-trypsin inhibitor |
| APOA1 | Apolipoprotein A-I |
| APOA2 | Apolipoprotein A-II |
| APOA4 | Apolipoprotein A-IV |
| APOC3 | Apolipoprotein C-III |
| APOH | Beta-2-glycoprotein 1 |
| APOL1 | Apolipoprotein L1 |
| C3 | Complement C3c alpha chain fragment 1 |
| C4B | Complement C4-B alpha chain |
| C5 | Complement C5 alpha chain |
| C8B | Complement component C8 beta chain |
| C9 | Complement component C9a |
| CFB | Complement factor B Ba fragment |
| CFH | Complement factor H |
| CLU | Clusterin alpha chain |
| CP | Ceruloplasmin |
| CPN2 | Carboxypeptidase N subunit 2 |
| F2 | Activation peptide fragment 1 |
| FGA | Fibrinogen alpha chain |
| FGB | Fibrinogen beta chain |
| FGG | Fibrinogen gamma chain |
| FN1 | Fibronectin |
| GC | Vitamin D-binding protein |
| GSN | Gelsolin |
| HBA1 | Hemoglobin subunit alpha 1 |
| HBB | Hemoglobin subunit beta |
| HP | Haptoglobin alpha chain |
| HPX | Hemopexin |
| HRG | Histidine-rich glycoprotein |
| HSPG2 | Basement membrane-specific heparan sulfate proteoglycan core protein |
| IGHV3OR16-9 | Immunoglobulin heavy variable 3/OR16-9 |
| IGKV2D-28 | Immunoglobulin kappa variable 2-28 |
| ITIH1 | Inter-alpha-trypsin inhibitor heavy chain H1 |
| ITIH2 | Inter-alpha-trypsin inhibitor heavy chain H2 |
| ITIH4 | 35 kDa inter-alpha-trypsin inhibitor heavy chain H4 |
| KNG1 | Low molecular weight growth-promoting factor |
| LBP | Lipopolysaccharide-binding protein |
| LRG1 | Leucine rich alpha-2-glycoprotein 1 |
| ORM1 | Alpha-1-acid glycoprotein 1 |
| PGLYRP2 | N-acetylmuramoyl-L-alanine amidase |
| PLG | Plasmin heavy chain A, short form |
| PON1 | Serum paraoxonase/arylesterase 1 |
| SERPINA1 | Short peptide from AAT |
| SERPINA3 | Alpha-1-antichymotrypsin His-Pro-less |
| SERPINA6 | Corticosteroid-binding globulin |
| SERPINA7 | Thyroxine-binding globulin |
| SERPINC1 | Antithrombin-III |
| SERPIND1 | Heparin cofactor 2 |
| SERPINF1 | Pigment epithelium-derived factor |
| SERPINF2 | Alpha-2-antiplasmin |
| SERPING1 | Plasma protease C1 inhibitor |
| SHBG | Sex hormone-binding globulin |
| TF | Serotransferrin |
| TTR | Transthyretin |
| VTN | Vitronectin V10 subunit |
| WHAMM | WASP homolog-associated protein with actin, membranes and microtubules |
